# Supplementary material for: Total retinal thickness: a neglected factor in the evaluation of inner retinal thickness
Source: HighWire-hosted journal article supplement (doi:10.1136/bmjophth-2022-001061), 2022-09-01
Supplement: bmjophth-2022-001061supp003_data_supplement.pdf [file bmjophth-2022-001061supp003_data_supplement.pdf]

**Supplementary eTable 1: Numbers and reasons for exclusions**

|                             | Number |
|-----------------------------|--------|
| <b>Subject level</b>        |        |
| Alcohol daily or almost     | 15,525 |
| Body mass index $\geq 30$   | 17,977 |
| Cognitive impairment        | 15,168 |
| Pre-diabetes                | 235    |
| Diabetes                    | 5,056  |
| Diabetic Neuropathy/Ulcers  | 121    |
| Gestational diabetes        | 227    |
| Hypertension                | 25,874 |
| Heart disease               | 6,694  |
| Neurological diseases       | 4,862  |
| Glycated hemoglobin > 29 %  | 1      |
| Sickle cell disease         | 131    |
| Retinal detachment          | 783    |
| Retinal Surgery             | 414    |
| Other serious eye condition | 1,434  |
| Eye Surgery                 | 663    |
| Disorders of optic nerve    | 88     |
| Macular degeneration        | 145    |
| Glaucoma                    | 2,983  |
| Chorioretinal diseases      | 470    |
| Cataract surgery            | 882    |
| Cataract                    | 3,236  |
| Blindness and low vision    | 238    |
| <b>Eye level</b>            |        |
| Cataract                    | 406    |
| Cataract surgery            | 29     |

|                                                         |       |
|---------------------------------------------------------|-------|
| Intraocular pressure (mmHg) >21                         | 2,149 |
| Visual acuity in LogMAR >0.3 (20/40 Snellen Equivalent) | 2,298 |
| Macular degeneration                                    | 138   |
| Refractive error (diopeters)                            | 1,198 |
| Eye injury                                              | 38    |
| Glaucoma                                                | 22    |
| Intraocular pressure (mmHg) < 5                         | 25    |
| Diabetic retinopathy                                    | 280   |

Some patients met multiple criteria

**Supplementary eTable 2: Comparison between included and excluded participants**

| Characteristic              | Include (N) | Include Mean (SD)/ Percent | Exclude (N) | Exclude Mean (SD)/ Percent | p-value |
|-----------------------------|-------------|----------------------------|-------------|----------------------------|---------|
| Age (years)                 | 20,237      | 54.7 (8.1)                 | 64,223      | 58.4 (7.8)                 | < .001  |
| Gender                      |             |                            |             |                            |         |
| Female                      | 12,284      | 60.7%                      | 33,063      | 51.5%                      |         |
| Male                        | 7,953       | 39.3%                      | 31,160      | 48.5%                      |         |
| Ancestral background        |             |                            |             |                            |         |
| White                       | 18,858      | 93.2%                      | 58,275      | 90.7%                      | < .001  |
| Black                       | 91          | 0.5%                       | 851         | 1.3%                       | < .001  |
| Prefer not to answer        | 132         | 0.7%                       | 371         | 0.6%                       |         |
| Asian                       | 548         | 2.7%                       | 2,150       | 3.4%                       | < .001  |
| Other                       | 608         | 3.0%                       | 2,576       | 4.0%                       | < .001  |
| Intraocular pressure (mmHg) | 19,709      | 15.0 (3.0)                 | 50,652      | 15.9 (4.2)                 | < .001  |
| Refractive error (diopters) | 20,038      | -0.3 (2.0)                 | 51,730      | -0.3 (2.9)                 | < .001  |
| Visual acuity (LogMAR)      | 20,214      | -0.0 (0.1)                 | 52,313      | 0.0 (0.2)                  | < .001  |

**Supplementary eTable 3: Association between retinal layer thickness and co-variables**

| Covariable                        | mRNFL - Univariable Regressions |           |                                                                  | GC-IPL - Univariable Regressions |           |                                                                  |
|-----------------------------------|---------------------------------|-----------|------------------------------------------------------------------|----------------------------------|-----------|------------------------------------------------------------------|
|                                   | Coefficient (95%CI)             | p-value   | Percent variation in thickness explained by each co-variable (%) | Coefficient (95%CI)              | p-value   | Percent variation in thickness explained by each co-variable (%) |
| Gender                            |                                 |           | 0.1                                                              |                                  |           | 0.7                                                              |
| Female                            | Reference                       | Reference |                                                                  | Reference                        | Reference |                                                                  |
| Male                              | -0.2 (-0.3, -0.1)               | < .001    |                                                                  | 1.0 (0.9, 1.2)                   | < .001    |                                                                  |
| Ancestral background              |                                 |           | 0.3                                                              |                                  |           | 0.2                                                              |
| White                             | Reference                       | Reference |                                                                  | Reference                        | Reference |                                                                  |
| Asian                             | -0.8 (-1.1, -0.5)               | < .001    |                                                                  | -1.3 (-1.8, -0.8)                | < .001    |                                                                  |
| Black                             | -1.5 (-2.2, -0.8)               | < .001    |                                                                  | -1.1 (-2.3, 0.1)                 | .07       |                                                                  |
| Other                             | -0.5 (-0.7, -0.2)               | < .001    |                                                                  | 0.0 (-0.5, 0.4)                  | .89       |                                                                  |
| Prefer not to answer              | -0.3 (-0.9, 0.3)                | .33       |                                                                  | -0.1 (-1.1, 0.9)                 | .79       |                                                                  |
| Alcohol intake                    |                                 |           | 0.1                                                              |                                  |           | 0.1                                                              |
| Never                             | Reference                       | Reference |                                                                  | Reference                        | Reference |                                                                  |
| Once or twice a week              | 0.3 (0.1, 0.5)                  | .004      |                                                                  | 0.4 (0.1, 0.8)                   | .01       |                                                                  |
| One to three times a month        | 0.3 (0.1, 0.5)                  | .012      |                                                                  | 0.4 (0.0, 0.7)                   | .05       |                                                                  |
| Prefer not to answer              | 0.0 (-1.6, 1.6)                 | .96       |                                                                  | -0.3 (-3.1, 2.5)                 | .82       |                                                                  |
| Special occasions only            | 0.2 (0.0, 0.4)                  | .10       |                                                                  | 0.1 (-0.3, 0.5)                  | .62       |                                                                  |
| Three or four times a week        | 0.2 (0.0, 0.4)                  | .03       |                                                                  | 0.1 (-0.2, 0.4)                  | .52       |                                                                  |
| Age (years)                       | 0.0 (0.0, 0.0)                  | < .001    | 0.2                                                              | -0.1 (-0.1, -0.1)                | < .001    | 2.4                                                              |
| Glycated hemoglobin (only < 6.5%) | -0.4 (-0.6, -0.3)               | < .001    | 0.2                                                              | -0.9 (-1.2, -0.6)                | < .001    | 0.3                                                              |
| Diastolic blood pressure (mmHg)   | 0.0 (0.0, 0.0)                  | .004      | 0.0                                                              | 0.0 (0.0, 0.0)                   | .08       | 0.0                                                              |
| Systolic blood pressure (mmHg)    | 0.0 (0.0, 0.0)                  | < .001    | 0.2                                                              | 0.0 (0.0, 0.0)                   | < .001    | 0.3                                                              |
| Intraocular pressure (mmHg)       | 0.0 (0.0, 0.0)                  | .03       | 0.0                                                              | -0.1 (-0.1, 0.0)                 | < .001    | 0.1                                                              |
| Visual acuity in LogMAR           | -1.1 (-1.5, -0.7)               | < .001    | 0.2                                                              | -3.1 (-3.7, -2.5)                | < .001    | 0.5                                                              |

|                                 |                   |        |      |                |        |      |
|---------------------------------|-------------------|--------|------|----------------|--------|------|
| Spherical power(diopters)       | -0.3 (-0.3, -0.3) | < .001 | 3.1  | 0.5 (0.5, 0.5) | < .001 | 3.1  |
| Spherical Equivalent (diopters) | -0.3 (-0.3, -0.3) | < .001 | 3.4  | 0.5 (0.5, 0.5) | < .001 | 2.9  |
| Total retinal thickness (μm)    | 0.1 (0.1, 0.1)    | < .001 | 16.3 | 0.3 (0.3, 0.3) | < .001 | 54.6 |

**Supplementary eFigure 1 legend: shows the distribution of the mRNFL and GC-IPL thickness**

**Supplementary eFigure 2. shows the relationship between macular retinal nerve fiber layer (RNFL) and ganglion cell inner plexiform layer (GC-IPL) and total retinal thickness.**

The linear form of total thickness accounts for 54.6% of the GC-IPL thickness variation and the quadratic form accounts for 54.6%. This is without accounting for any other subject information such as ethnicity, sex, age etc. The linear form of total thickness accounts for 16.3% of the RNFL thickness variation and the quadratic form accounts for 16.2%. This is without accounting for any other subject information such as ethnicity, sex, age, etc.
