# Supplementary figures and images for: Total retinal thickness: a neglected factor in the evaluation of inner retinal thickness
Source: HighWire-hosted journal article supplement (doi:10.1136/bmjophth-2022-001061), 2022-09-01

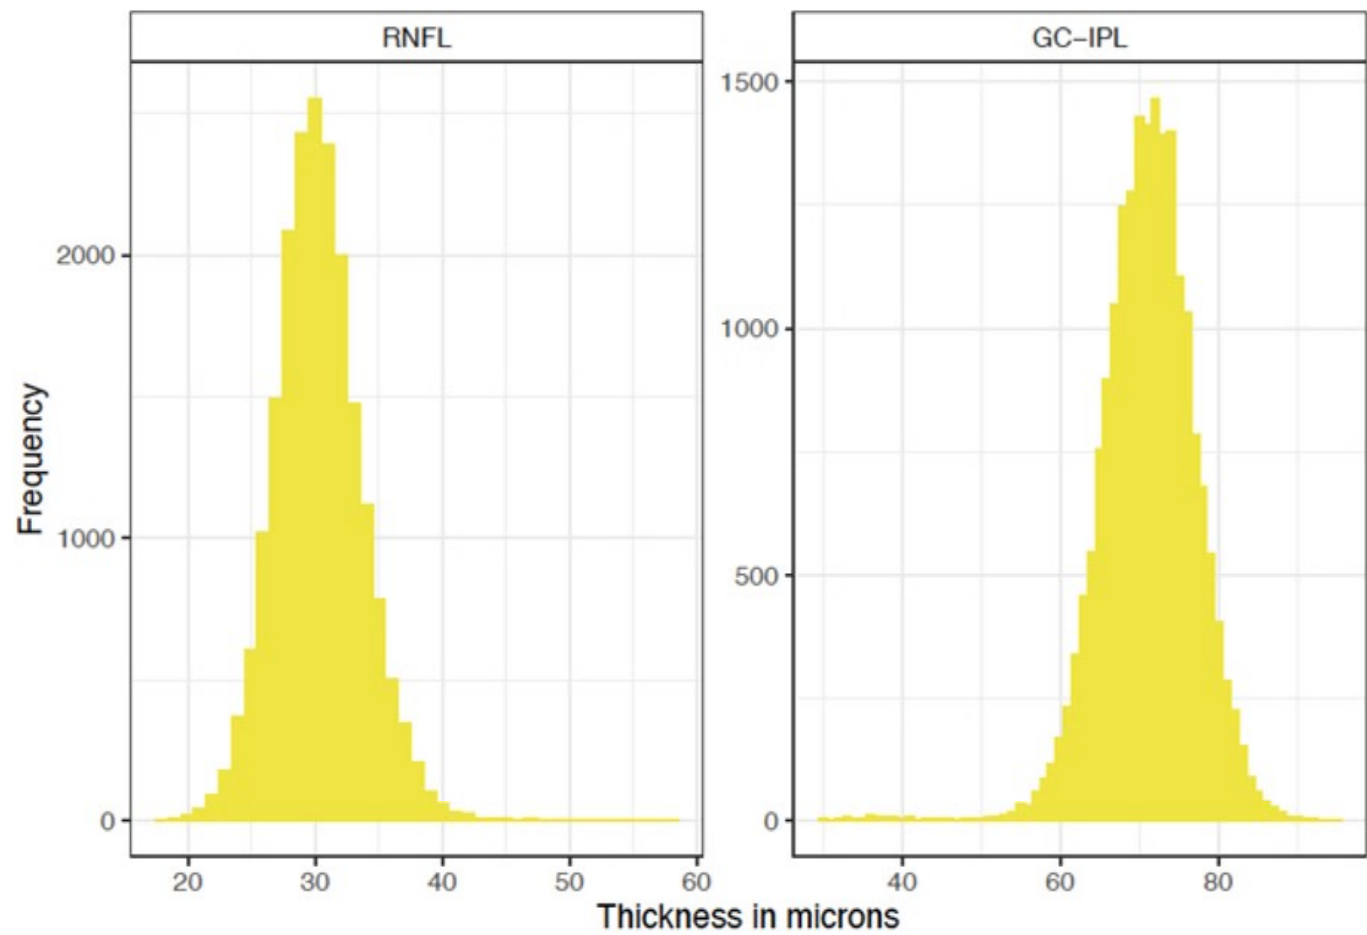

Supplement: bmjophth-2022-001061supp001_data_supplement.pdf [file bmjophth-2022-001061supp001_data_supplement.pdf]
